# Supplementary material for: Preparation and Desalination of Semi-Aromatic Polyamide Reverse Osmosis Membranes (ROMs)
Source: MDPI journal article supplement (doi:10.3390/polym15071683), 2023-03-28
Supplement: s1 [file s1]

# Title Preparation and Desalination of Semi-Aromatic Polyamide Reverse Osmosis Membranes (ROMs)

Haiyang Zhu <sup>1,2</sup>, Bingbing Yuan <sup>3,\*</sup> and Yuchuan Li <sup>1,\*</sup>

<sup>1</sup> School of Materials Science and Engineering, Beijing Institute of Technology, Beijing 100081, China

<sup>2</sup> Lunan Research Institute of Beijing Institute of Technology, Tengzhou 277599, China

<sup>3</sup> School of Chemistry and Chemical Engineering, Key Laboratory of Green Chemical Media and Reactions, Ministry of Education, Collaborative Innovation Center of Henan Province for Green Manufacturing of Fine Chemicals, Henan International Joint Laboratory of Aquatic Toxicology and Health Protection, Henan Normal University, Xinxiang 453007, China

\* Correspondence: yuanbingbing@htu.edu.cn (B.Y.); liyuchuan@bit.edu.cn (Y.L.); Tel.: +86-010-68915822 (Y.L.)

**Table S1.** Comparison of NaCl rejection from the polyamide membranes fabricated via CPTC-MPD, and literatures reported membranes that are fabricated by TMC and MPD.

| Membrane                 | NaCl Rejection (%) | Water flux ( $\text{kg m}^{-2} \text{ h}^{-1}$ ) |
|--------------------------|--------------------|--------------------------------------------------|
| ROM-3                    | 97                 | 56.1                                             |
| CD-TFC-250               | $99.0 \pm 0.3$     | $22.2 \pm 1.24$                                  |
| TFC-B                    | $95.66 \pm 0.12$   | $22.7 \pm 1.7$                                   |
| PIP-DHBA-DHBA            | $99.1 \pm 0.2$     | 46.04                                            |
| ZIF-67/PA                | 99.28              | 45.57                                            |
| PA-IL                    | 99.2               | 30.7                                             |
| PA-MMP <sub>0.05</sub>   | 94.7               | 53.1                                             |
| FBN-PA                   | 97.8               | 62                                               |
| TFC-1D-3                 | $96.7 \pm 1.1$     | 38.44                                            |
| TFN-Ns-0.06              | 96                 | 71.3                                             |
| TFC                      | 97.7               | 47                                               |
| PA/POSS                  | 98                 | 21.7                                             |
| HPP-ZIF-8-RO             | 99                 | 50                                               |
| ROM-DEP-0.5              | 98.2               | 44.18                                            |
| IPSA-3                   | 99.2               | 43.09                                            |
| TFC-M                    | 98.9               | 45.32                                            |
| KRO-1                    | 99.6               | 10.9                                             |
| DSC-DPPE                 | $99.5 \pm 0.1$     | 40.3                                             |
| pPa2CNs/PA               | 97.7               | 34.1                                             |
| PMABSA/TMC               | $98.2 \pm 0.4$     | $18.29 \pm 0.17$                                 |
| Ag-NPs                   | $99.0 \pm 0.2$     | 26.35                                            |
| RO-stress-rinse          | 99.39              | 48                                               |
| GO-ZnO-RO                | 99.3               | 14.4                                             |
| rGO/TiO <sub>2</sub> /RO | 99.45              | 51.3                                             |
| TFN-GOQD/AP50            | 98.4               | 39.6                                             |

|                        |                  |                 |
|------------------------|------------------|-----------------|
| PA04 TFN               | 92.1             | 27              |
| MWCNT/RO               | 97.8             | 28.9            |
| L-0.2                  | 99.03            | 42.63           |
| 0.1%-CNC-TFN           | 97.8             | 47.25 $\pm$ 7.5 |
| MoS2-TFN               | 92.9             | 98.6            |
| DSC                    | 99.1 $\pm$ 0.6   | 31.8 $\pm$ 1.9  |
| CNC-TFC                | 99.1 $\pm$ 0.2   | 23.25           |
| IP@FI-0.05             | 96.0 $\pm$ 1.9   | 40.35           |
| mLbL <sub>15</sub> -PA | 98.7 $\pm$ 0.3   | 20.7 $\pm$ 3.7  |
| TFC-pH10.3             | 99.4 $\pm$ 0.1   | 37.2            |
| TFN-ZIF-8              | 98.5 $\pm$ 0.5   | 51.93           |
| TMC/MPD mLbL           | 96.5             | 6.51            |
| g-C3N4 NS PA/CN100     | 99.23            | 20.95           |
| TFN MR-I               | 96               | 47              |
| PA (nano zeolite)      | ~95              | 29.79           |
| MPD/TMC                | 92.8             | 9.51            |
| PPD/TMC                | 97               | 6.0             |
| MPD/TMC                | 96               | 45              |
| TFN-mGO                | 99.7             | 23.6            |
| TFN                    | 98.7             | 47.36           |
| RO-PSbPDz              | 99               | 26.2            |
| PA-GO                  | 99.7             | 36.5            |
| RO-Ti3C2Tx             | 98.5             | 39.22           |
| PA-TFC-DMSO-0.3        | 99.4 $\pm$ 0.2   | 46.5            |
| TFC-6                  | 97.8             | 42.63           |
| RO-0.015               | 99.4             | 38.05           |
| P(mPDTA)               | 98.2 $\pm$ 0.6   | 23.0 $\pm$ 4.8  |
| PA/BHPF                | 95.07 $\pm$ 0.35 | 41.08 $\pm$ 1.1 |
| PA-ZIF-8               | 98.6             | 40.5            |

|           |                |                 |
|-----------|----------------|-----------------|
| XLE       | $92.6 \pm 0.5$ | $101.8 \pm 1.4$ |
| NF 90     | $83.8 \pm 0.3$ | $125.4 \pm 1.0$ |
| SW30HR    | $98.5 \pm 0.2$ | $9.0 \pm 0.8$   |
| CPTC-TAEA | 98.28          | 65.38           |

---
